# Supplementary material for: pH-dependent assembly of metal–organic hybrid compounds based on octamolybdates and a new flexible multidentate ligand
Source: Royal Society of Chemistry journal article supplement (doi:10.1039/c3ce41223g), 2013-01-01
Supplement: c3ce41223g.pdf [file c3ce41223g.pdf]

Supplementary material for

**pH-Dependent assembly of metal–organic hybrid compounds based  
on octamolybdates with a new flexible multidentate ligand**

**Zhong-Cheng Yue,<sup>a</sup> Li-Xia Shen,<sup>a</sup> Huan-Huan Wu,<sup>a</sup> Xing-Hui Li,<sup>a</sup> and Yun-Yin Niu<sup>a\*</sup>**

<sup>a</sup>*College of Chemistry and Molecular Engineering, Zhengzhou University, Zhengzhou 450001, P. R. China. Email: niuyy@zzu.edu.cn*

**Table S1.** Selected bond distances(Å) and angles(°)for compound 1-6

**Compound 1**

|         |           |          |          |
|---------|-----------|----------|----------|
| Mo4—Mo3 | 3.2146(6) | Mo3—O10  | 1.705(4) |
| Mo4—O26 | 1.743(3)  | Mo7—O23  | 1.930(3) |
| Mo4—O7  | 2.376(3)  | Mo7—O12  | 1.934(3) |
| Mo4—O8  | 1.954(3)  | Mo7—O21  | 1.700(3) |
| Mo4—O13 | 2.130(3)  | Mo7—O20  | 2.320(3) |
| Mo4—O15 | 1.946(3)  | Mo7—O13  | 2.393(3) |
| Mo4—O14 | 1.694(3)  | Mo7—O22  | 1.689(3) |
| Mo5—O16 | 1.693(3)  | Mo9—O28  | 1.677(4) |
| Mo5—O3  | 1.897(3)  | Mo9—O31  | 1.957(3) |
| Mo5—O18 | 1.990(3)  | Mo9—O27  | 1.956(3) |
| Mo5—O7  | 2.272(3)  | Mo9—O29  | 2.128(3) |
| Mo5—O15 | 2.341(3)  | Mo9—O30  | 1.756(3) |
| Mo5—O17 | 1.716(4)  | Mo11—O36 | 1.718(4) |
| Mo6—O20 | 1.740(3)  | Mo11—O34 | 1.925(3) |
| Mo6—O18 | 1.965(3)  | Mo11—O30 | 2.297(4) |
| Mo6—O7  | 2.177(3)  | Mo11—O35 | 1.691(3) |
| Mo6—O9  | 1.944(3)  | Mo11—O37 | 1.916(3) |
| Mo6—O13 | 2.376(3)  | Mo12—O38 | 1.701(3) |
| Mo6—O19 | 1.692(3)  | Mo12—O39 | 1.694(4) |
| Mo8—O24 | 1.704(3)  | Mo12—O31 | 1.984(3) |
| Mo8—O23 | 1.897(3)  | Mo1—O3   | 1.927(4) |
| Mo8—O18 | 2.299(3)  | Mo1—O1   | 1.697(3) |
| Mo8—O13 | 2.345(3)  | Mo1—O26  | 2.317(3) |
| Mo8—O15 | 2.014(3)  | Mo1—O7   | 2.466(3) |
| Mo8—O25 | 1.692(4)  | Mo1—O2   | 1.699(3) |
| Mo2—O5  | 1.701(3)  | Mo1—O4   | 1.909(3) |
| Mo2—O7  | 2.354(3)  | Mo3—O12  | 1.903(3) |

|             |            |               |            |
|-------------|------------|---------------|------------|
| Mo2—O9      | 2.007(3)   | Mo3—O11       | 1.695(3)   |
| Mo2—O8      | 2.331(3)   | Mo3—O9        | 2.327(3)   |
| Mo2—O4      | 1.906(3)   | Mo3—O8        | 1.993(3)   |
| Mo2—O6      | 1.691(4)   | Mo3—O13       | 2.366(3)   |
| O26—Mo4—Mo3 | 131.78(12) | Mo6—O7—Mo4    | 103.56(11) |
| O26—Mo4—O7  | 80.99(13)  | Mo6—O7—Mo5    | 92.77(13)  |
| O26—Mo4—O8  | 95.90(14)  | Mo6—O7—Mo2    | 91.0(1)    |
| O26—Mo4—O13 | 157.11(13) | Mo6—O7—Mo1    | 164.16(14) |
| O26—Mo4—O15 | 95.79(14)  | Mo2—O7—Mo4    | 97.03(12)  |
| O7—Mo4—Mo3  | 86.53(7)   | Mo2—O7—Mo1    | 84.91(11)  |
| O8—Mo4—Mo3  | 35.88(8)   | Mo6—O9—Mo2    | 109.87(13) |
| O8—Mo4—O7   | 77.84(12)  | Mo6—O9—Mo3    | 112.00(13) |
| O8—Mo4—O13  | 79.51(12)  | Mo2—O9—Mo3    | 103.25(14) |
| O13—Mo4—Mo3 | 47.38(9)   | Mo4—O8—Mo2    | 111.23(13) |
| O13—Mo4—O7  | 76.12(11)  | Mo4—O8—Mo3    | 109.04(15) |
| O15—Mo4—Mo3 | 126.56(9)  | Mo3—O8—Mo2    | 103.55(13) |
| O15—Mo4—O7  | 77.42(12)  | Mo4—O13—Mo6   | 105.03(11) |
| O15—Mo4—O8  | 150.52(13) | Mo4—O13—Mo8   | 92.45(10)  |
| O15—Mo4—O13 | 79.22(12)  | Mo4—O13—Mo3   | 91.13(12)  |
| O14—Mo4—Mo3 | 89.58(11)  | Mo4—O13—Mo7   | 161.95(15) |
| O14—Mo4—O26 | 105.19(16) | Mo6—O13—Mo7   | 93.00(11)  |
| O14—Mo4—O7  | 173.80(14) | Mo8—O13—Mo6   | 96.42(12)  |
| O14—Mo4—O8  | 101.71(15) | Mo8—O13—Mo3   | 164.87(14) |
| O14—Mo4—O13 | 97.70(14)  | Mo8—O13—Mo7   | 86.25(11)  |
| O14—Mo4—O15 | 101.17(15) | Mo3—O13—Mo6   | 96.84(11)  |
| O16—Mo5—O3  | 101.74(15) | Mo3—O13—Mo7   | 85.80(9)   |
| O16—Mo5—O18 | 97.35(14)  | Mo10—O34—Mo11 | 117.34(15) |
| O16—Mo5—O7  | 95.86(15)  | Mo2—O4—Mo1    | 117.10(18) |
| O16—Mo5—O15 | 165.64(13) | Mo4—O15—Mo5   | 109.66(13) |
| O16—Mo5—O17 | 106.00(19) | Mo4—O15—Mo8   | 109.49(13) |
| O3—Mo5—O18  | 147.66(14) | Mo8—O15—Mo5   | 102.30(14) |
| O3—Mo5—O7   | 78.01(13)  | Mo9—O29—Mo12  | 92.27(10)  |
| O3—Mo5—O15  | 84.15(12)  | Mo9—O30—Mo11  | 117.85(16) |
| O18—Mo5—O7  | 74.26(12)  | O31—Mo12—O29  | 72.87(11)  |
| O18—Mo5—O15 | 71.91(11)  | O33—Mo10—O31  | 166.51(13) |
| O7—Mo5—O15  | 72.36(11)  | O33—Mo10—O34  | 100.80(17) |
| O17—Mo5—O3  | 98.39(16)  | O34—Mo10—O31  | 84.12(13)  |
| O17—Mo5—O18 | 101.12(15) | O32—Mo10—O33  | 104.15(17) |
| O17—Mo5—O7  | 158.10(15) | O32—Mo10—O31  | 87.12(15)  |
| O17—Mo5—O15 | 85.82(15)  | O32—Mo10—O34  | 100.20(15) |
| O20—Mo6—O18 | 96.65(14)  | Mo5—O3—Mo1    | 117.18(15) |
| O20—Mo6—O7  | 155.93(13) | Mo4—O26—Mo1   | 117.66(16) |
| O20—Mo6—O9  | 97.53(14)  | Mo8—O23—Mo7   | 115.64(18) |
| O20—Mo6—O13 | 80.69(13)  | Mo3—O12—Mo7   | 115.20(15) |

|             |            |               |            |
|-------------|------------|---------------|------------|
| O18—Mo6—O7  | 76.96(12)  | Mo6—O20—Mo7   | 116.15(16) |
| O18—Mo6—O13 | 77.25(12)  | Mo9—O31—Mo12  | 109.99(13) |
| O7—Mo6—O13  | 75.27(10)  | Mo9—O31—Mo10  | 110.90(15) |
| O9—Mo6—O18  | 148.46(13) | Mo12—O31—Mo10 | 103.07(14) |
| O9—Mo6—O7   | 78.64(12)  | Mo5—O18—Mo8   | 104.55(13) |
| O9—Mo6—O13  | 77.45(12)  | Mo6—O18—Mo5   | 109.09(15) |
| O19—Mo6—O20 | 105.00(16) | Mo6—O18—Mo8   | 111.02(13) |
| O19—Mo6—O18 | 100.18(15) | Mo4—O7—Mo1    | 92.14(11)  |
| O19—Mo6—O7  | 98.99(14)  | Mo5—O7—Mo4    | 98.12(11)  |
| O19—Mo6—O9  | 103.11(15) | Mo5—O7—Mo2    | 163.06(14) |
| O19—Mo6—O13 | 174.07(13) | Mo5—O7—Mo1    | 86.99(9)   |
| O24—Mo8—O23 | 102.22(14) | O5—Mo2—O9     | 96.13(15)  |
| O24—Mo8—O18 | 162.40(15) | O5—Mo2—O8     | 161.34(16) |
| O24—Mo8—O13 | 94.38(14)  | O5—Mo2—O4     | 102.24(15) |
| O24—Mo8—O15 | 93.27(14)  | O9—Mo2—O7     | 73.27(11)  |
| O23—Mo8—O18 | 85.91(12)  | O9—Mo2—O8     | 71.46(12)  |
| O23—Mo8—O13 | 77.34(13)  | O8—Mo2—O7     | 71.57(11)  |
| O23—Mo8—O15 | 147.32(13) | O4—Mo2—O7     | 77.57(13)  |
| O18—Mo8—O13 | 71.96(11)  | O4—Mo2—O9     | 145.83(13) |
| O15—Mo8—O18 | 72.42(11)  | O4—Mo2—O8     | 82.79(12)  |
| O15—Mo8—O13 | 72.88(11)  | O6—Mo2—O5     | 104.93(17) |
| O25—Mo8—O24 | 105.15(17) | O6—Mo2—O7     | 162.59(14) |
| O25—Mo8—O23 | 101.76(16) | O6—Mo2—O9     | 99.58(14)  |
| O25—Mo8—O18 | 88.13(14)  | O6—Mo2—O8     | 91.16(14)  |
| O25—Mo8—O13 | 160.09(14) | O6—Mo2—O4     | 103.09(16) |
| O25—Mo8—O15 | 101.66(14) | O3—Mo1—O26    | 77.04(13)  |
| O5—Mo2—O7   | 91.77(15)  | O3—Mo1—O7     | 72.71(11)  |
| O1—Mo1—O3   | 97.87(16)  | O22—Mo7—O12   | 100.92(15) |
| O1—Mo1—O26  | 166.19(14) | O22—Mo7—O21   | 105.31(17) |
| O1—Mo1—O7   | 97.10(13)  | O22—Mo7—O20   | 91.48(14)  |
| O1—Mo1—O2   | 105.10(16) | O22—Mo7—O13   | 161.61(14) |
| O1—Mo1—O4   | 100.38(15) | O28—Mo9—O31   | 101.58(16) |
| O26—Mo1—O7  | 69.17(10)  | O28—Mo9—O27   | 101.56(16) |
| O2—Mo1—O3   | 101.54(16) | O28—Mo9—O29   | 99.73(15)  |
| O2—Mo1—O26  | 88.57(13)  | O28—Mo9—O30   | 104.47(16) |
| O2—Mo1—O7   | 157.68(13) | O31—Mo9—O29   | 78.47(11)  |
| O2—Mo1—O4   | 102.98(17) | O27—Mo9—O31   | 149.65(14) |
| O4—Mo1—O3   | 144.25(12) | O27—Mo9—O29   | 78.50(12)  |
| O4—Mo1—O26  | 77.98(13)  | O30—Mo9—O31   | 96.16(13)  |
| O4—Mo1—O7   | 74.71(12)  | O30—Mo9—O27   | 96.78(14)  |
| O12—Mo3—Mo4 | 118.48(10) | O30—Mo9—O29   | 155.79(16) |
| O12—Mo3—O9  | 83.16(12)  | O36—Mo11—O34  | 98.89(16)  |
| O12—Mo3—O8  | 145.89(14) | O36—Mo11—O30  | 162.74(13) |
| O12—Mo3—O13 | 77.00(12)  | O36—Mo11—O37  | 98.49(16)  |

|             |            |              |            |
|-------------|------------|--------------|------------|
| O11—Mo3—Mo4 | 83.16(11)  | O34—Mo11—O30 | 77.59(14)  |
| O11—Mo3—O12 | 101.15(16) | O35—Mo11—O36 | 105.60(18) |
| O11—Mo3—O9  | 161.14(14) | O35—Mo11—O34 | 102.17(16) |
| O11—Mo3—O8  | 96.12(14)  | O35—Mo11—O30 | 91.65(17)  |
| O11—Mo3—O13 | 91.96(15)  | O35—Mo11—O37 | 102.04(15) |
| O11—Mo3—O10 | 105.31(19) | O37—Mo11—O34 | 145.01(14) |
| O9—Mo3—Mo4  | 78.72(7)   | O37—Mo11—O30 | 76.84(14)  |
| O9—Mo3—O13  | 70.95(11)  | O38—Mo12—O31 | 101.96(14) |
| O8—Mo3—Mo4  | 35.08(9)   | O38—Mo12—O29 | 159.79(16) |
| O8—Mo3—O9   | 71.79(11)  | O39—Mo12—O38 | 104.05(19) |
| O8—Mo3—O13  | 73.19(12)  | O39—Mo12—O31 | 99.28(15)  |
| O13—Mo3—Mo4 | 41.49(7)   | O39—Mo12—O29 | 96.11(15)  |
| O10—Mo3—Mo4 | 137.06(12) | O12—Mo7—O20  | 77.51(13)  |
| O10—Mo3—O12 | 101.38(16) | O12—Mo7—O13  | 75.76(11)  |
| O10—Mo3—O9  | 91.62(15)  | O21—Mo7—O23  | 100.79(15) |
| O10—Mo3—O8  | 102.09(15) | O21—Mo7—O12  | 97.97(16)  |
| O10—Mo3—O13 | 162.57(15) | O21—Mo7—O20  | 163.18(14) |
| O23—Mo7—O12 | 146.33(12) | O21—Mo7—O13  | 93.08(14)  |
| O23—Mo7—O20 | 76.46(12)  | O20—Mo7—O13  | 70.13(11)  |
| O23—Mo7—O13 | 75.54(12)  | O22—Mo7—O23  | 100.74(16) |

## Compound 2

|         |           |                        |          |
|---------|-----------|------------------------|----------|
| Mo5—Mo1 | 3.2195(5) | O14—Mo3                | 1.993(3) |
| Mo5—O5  | 2.076(3)  | Mo7—O24                | 1.760(3) |
| Mo5—O4  | 2.100(3)  | Mo7—O23                | 1.683(3) |
| Mo5—O19 | 2.381(3)  | Mo7—O22                | 1.836(3) |
| Mo5—O18 | 1.751(3)  | Mo8—O25                | 1.699(3) |
| Mo5—O17 | 1.859(3)  | Mo8—O24                | 2.227(3) |
| Mo5—O16 | 1.674(3)  | Mo8—O26                | 1.717(3) |
| Mo6—O20 | 1.684(4)  | Mo3—O11                | 1.868(3) |
| Mo6—O19 | 2.308(3)  | Mo3—O10                | 2.218(3) |
| Mo6—O18 | 2.278(3)  | Mo3—O13                | 1.723(3) |
| Mo6—O14 | 1.973(3)  | Mo3—O8                 | 2.380(3) |
| Mo6—O22 | 1.935(3)  | Mo3—O12                | 1.698(3) |
| Mo6—O21 | 1.697(3)  | Mo2—O3                 | 2.132(3) |
| Mo4—O19 | 1.838(3)  | Mo2—O7                 | 1.870(3) |
| Mo4—O9  | 1.760(3)  | Mo2—O10                | 2.467(3) |
| Mo4—O14 | 2.149(3)  | Mo2—O8                 | 1.749(3) |
| Mo4—O15 | 1.689(3)  | Mo2—O6                 | 1.681(3) |
| Mo4—O10 | 1.989(3)  | Cu1—O1 <sup>i</sup>    | 1.971(3) |
| Mo1—O5  | 2.196(3)  | Cu1—O1                 | 1.971(3) |
| Mo1—O4  | 1.824(3)  | Cu1—O26 <sup>ii</sup>  | 2.409(3) |
| Mo1—O9  | 2.399(3)  | Cu1—O26 <sup>iii</sup> | 2.409(3) |
| Mo1—O3  | 1.980(3)  | Cu1—O27 <sup>i</sup>   | 1.937(3) |
| Mo1—O2  | 1.694(3)  | Cu1—O27                | 1.937(3) |

|             |            |                                         |            |
|-------------|------------|-----------------------------------------|------------|
| Mo1—O1      | 1.762(3)   | O5—Mo2                                  | 2.007(3)   |
| O5—Mo5—Mo1  | 42.51(7)   | O11—Mo3—O14                             | 142.88(12) |
| O5—Mo5—O4   | 72.03(10)  | O11—Mo3—Mo7 <sup>ii</sup>               | 37.36(9)   |
| O5—Mo5—O19  | 75.62(11)  | O11—Mo3—O10                             | 74.31(10)  |
| O4—Mo5—Mo1  | 32.14(7)   | O11—Mo3—O8                              | 80.62(12)  |
| O4—Mo5—O19  | 80.47(11)  | O10—Mo3—Mo7 <sup>ii</sup>               | 40.18(7)   |
| O19—Mo5—Mo1 | 86.01(7)   | O10—Mo3—O8                              | 70.45(11)  |
| O18—Mo5—Mo1 | 134.02(9)  | O13—Mo3—O14                             | 99.69(13)  |
| O18—Mo5—O5  | 91.63(12)  | O13—Mo3—Mo7 <sup>ii</sup>               | 145.3(1)   |
| O18—Mo5—O4  | 155.00(13) | O13—Mo3—O11                             | 108.18(13) |
| O18—Mo5—O19 | 77.12(13)  | O13—Mo3—O10                             | 155.82(14) |
| O18—Mo5—O17 | 101.53(13) | O13—Mo3—O8                              | 86.05(13)  |
| O17—Mo5—Mo1 | 118.97(9)  | O8—Mo3—Mo7 <sup>ii</sup>                | 83.86(7)   |
| O17—Mo5—O5  | 152.55(14) | O12—Mo3—O14                             | 95.72(14)  |
| O17—Mo5—O4  | 86.86(12)  | O12—Mo3—Mo7 <sup>ii</sup>               | 90.65(11)  |
| O17—Mo5—O19 | 83.90(12)  | O12—Mo3—O11                             | 100.78(14) |
| O16—Mo5—Mo1 | 89.11(11)  | O12—Mo3—O10                             | 99.21(14)  |
| O16—Mo5—O5  | 97.84(14)  | O12—Mo3—O13                             | 103.76(15) |
| O16—Mo5—O4  | 97.64(14)  | O12—Mo3—O8                              | 168.92(13) |
| O16—Mo5—O19 | 173.45(12) | O5—Mo2—O3                               | 71.3(1)    |
| O16—Mo5—O18 | 103.37(16) | O5—Mo2—O10                              | 76.81(11)  |
| O16—Mo5—O17 | 102.31(15) | O3—Mo2—O10                              | 80.06(11)  |
| O20—Mo6—O19 | 95.83(15)  | O7—Mo2—O5                               | 139.82(13) |
| O20—Mo6—O18 | 165.00(15) | O7—Mo2—O3                               | 75.12(11)  |
| O20—Mo6—O14 | 97.34(15)  | O7—Mo2—O10                              | 76.23(11)  |
| O20—Mo6—O22 | 97.07(15)  | O8—Mo2—O5                               | 98.75(12)  |
| O20—Mo6—O21 | 104.71(18) | O8—Mo2—O3                               | 155.65(14) |
| O18—Mo6—O19 | 69.76(11)  | O8—Mo2—O7                               | 102.95(12) |
| O14—Mo6—O19 | 69.65(10)  | O8—Mo2—O10                              | 75.98(12)  |
| O14—Mo6—O18 | 81.85(12)  | O6—Mo2—O5                               | 102.14(13) |
| O22—Mo6—O19 | 85.60(11)  | O6—Mo2—O3                               | 99.77(14)  |
| O22—Mo6—O18 | 78.19(12)  | O6—Mo2—O7                               | 104.74(14) |
| O22—Mo6—O14 | 152.43(12) | O6—Mo2—O10                              | 178.95(12) |
| O21—Mo6—O19 | 157.51(15) | O6—Mo2—O8                               | 104.10(15) |
| O21—Mo6—O18 | 90.21(15)  | Mo1—O3—Mo2                              | 108.51(12) |
| O21—Mo6—O14 | 98.27(14)  | Mo8 <sup>ii</sup> —O3—Mo1               | 145.22(14) |
| O21—Mo6—O22 | 100.62(15) | Mo8 <sup>ii</sup> —O3—Mo2               | 104.58(11) |
| O19—Mo4—O14 | 75.78(11)  | Mo8 <sup>ii</sup> —O7—Mo7 <sup>ii</sup> | 95.02(11)  |
| O19—Mo4—O10 | 140.03(14) | Mo2—O7—Mo7 <sup>ii</sup>                | 109.56(13) |
| O9—Mo4—O19  | 103.23(12) | Mo2—O7—Mo8 <sup>ii</sup>                | 105.45(11) |
| O9—Mo4—O14  | 154.59(14) | Mo7—O24—Mo8                             | 115.84(16) |
| O9—Mo4—O10  | 96.28(12)  | Mo3—O11—Mo7 <sup>ii</sup>               | 109.47(13) |
| O15—Mo4—O19 | 105.88(14) | Mo4—O10—Mo7 <sup>ii</sup>               | 145.22(17) |
| O15—Mo4—O9  | 104.99(15) | Mo4—O10—Mo3                             | 104.15(11) |

|                                           |            |                                          |            |
|-------------------------------------------|------------|------------------------------------------|------------|
| O15—Mo4—O14                               | 99.56(14)  | Mo4—O10—Mo2                              | 105.25(11) |
| O15—Mo4—O10                               | 102.14(13) | Mo7 <sup>ii</sup> —O10—Mo3               | 96.62(10)  |
| O10—Mo4—O14                               | 71.90(11)  | Mo7 <sup>ii</sup> —O10—Mo2               | 99.36(11)  |
| O5—Mo1—Mo5                                | 39.71(7)   | Mo3—O10—Mo2                              | 97.18(11)  |
| O5—Mo1—O9                                 | 72.14(11)  | Mo7—O22—Mo6                              | 157.9(2)   |
| O4—Mo1—Mo5                                | 37.77(9)   | Mo1—O1—Cu1                               | 143.03(16) |
| O4—Mo1—O5                                 | 74.66(11)  | Mo2—O8—Mo3                               | 115.99(15) |
| O4—Mo1—O9                                 | 80.99(12)  | Mo8—O26—Cu1 <sup>iv</sup>                | 139.17(15) |
| O4—Mo1—O3                                 | 143.38(12) | Cu1—O27—H27A                             | 111.000    |
| O9—Mo1—Mo5                                | 84.29(7)   | Cu1—O27—H27B                             | 110.600    |
| O3—Mo1—Mo5                                | 109.91(8)  | O24—Mo7—Mo3 <sup>iv</sup>                | 132.68(9)  |
| O3—Mo1—O5                                 | 70.43(10)  | O24—Mo7—O7 <sup>iv</sup>                 | 75.91(13)  |
| O3—Mo1—O9                                 | 78.19(11)  | O24—Mo7—O11 <sup>iv</sup>                | 154.20(13) |
| O2—Mo1—Mo5                                | 93.83(11)  | O24—Mo7—O10 <sup>iv</sup>                | 89.54(11)  |
| O2—Mo1—O5                                 | 101.92(14) | O24—Mo7—O22                              | 101.93(13) |
| O2—Mo1—O4                                 | 101.87(14) | O11 <sup>iv</sup> —Mo7—Mo3 <sup>iv</sup> | 33.17(7)   |
| O2—Mo1—O9                                 | 172.65(13) | O11 <sup>iv</sup> —Mo7—O7 <sup>iv</sup>  | 80.95(11)  |
| O2—Mo1—O3                                 | 95.85(14)  | O11 <sup>iv</sup> —Mo7—O10 <sup>iv</sup> | 73.26(10)  |
| O2—Mo1—O1                                 | 104.48(15) | O23—Mo7—Mo3 <sup>iv</sup>                | 87.13(11)  |
| O1—Mo1—Mo5                                | 144.88(10) | O23—Mo7—O7 <sup>iv</sup>                 | 171.18(12) |
| O1—Mo1—O5                                 | 152.11(13) | O23—Mo7—O24                              | 103.93(16) |
| O1—Mo1—O4                                 | 108.11(14) | O23—Mo7—O11 <sup>iv</sup>                | 97.19(14)  |
| O1—Mo1—O9                                 | 80.80(12)  | O23—Mo7—O10 <sup>iv</sup>                | 96.63(14)  |
| O1—Mo1—O3                                 | 97.91(12)  | O23—Mo7—O22                              | 103.70(15) |
| O1—Cu1—O1 <sup>i</sup>                    | 179.998(1) | O10 <sup>iv</sup> —Mo7—Mo3 <sup>iv</sup> | 43.19(7)   |
| O1 <sup>i</sup> —Cu1—O26 <sup>iii</sup>   | 91.89(12)  | O10 <sup>iv</sup> —Mo7—O7 <sup>iv</sup>  | 74.57(11)  |
| O1—Cu1—O26 <sup>iii</sup>                 | 88.11(12)  | O22—Mo7—Mo3 <sup>iv</sup>                | 120.16(10) |
| O1 <sup>i</sup> —Cu1—O26 <sup>ii</sup>    | 88.12(12)  | O22—Mo7—O7 <sup>iv</sup>                 | 84.86(13)  |
| O1—Cu1—O26 <sup>ii</sup>                  | 91.88(12)  | O22—Mo7—O11 <sup>iv</sup>                | 87.04(12)  |
| O26 <sup>ii</sup> —Cu1—O26 <sup>iii</sup> | 180.000    | O22—Mo7—O10 <sup>iv</sup>                | 153.31(15) |
| O27—Cu1—O1                                | 90.14(13)  | O17—Mo8—O3 <sup>iv</sup>                 | 156.99(12) |
| O27 <sup>i</sup> —Cu1—O1                  | 89.86(13)  | O17—Mo8—O7 <sup>iv</sup>                 | 89.42(11)  |
| O27 <sup>i</sup> —Cu1—O1 <sup>i</sup>     | 90.14(13)  | O17—Mo8—O24                              | 79.34(12)  |
| O27—Cu1—O1 <sup>i</sup>                   | 89.86(13)  | O3 <sup>iv</sup> —Mo8—O7 <sup>iv</sup>   | 71.24(10)  |
| O27—Cu1—O26 <sup>ii</sup>                 | 91.94(12)  | O3 <sup>iv</sup> —Mo8—O24                | 82.64(11)  |
| O27 <sup>i</sup> —Cu1—O26 <sup>iii</sup>  | 91.94(12)  | O7 <sup>iv</sup> —Mo8—O24                | 71.45(11)  |
| O27—Cu1—O26 <sup>iii</sup>                | 88.06(12)  | O25—Mo8—O17                              | 96.43(15)  |
| O27 <sup>i</sup> —Cu1—O26 <sup>ii</sup>   | 88.06(12)  | O25—Mo8—O3 <sup>iv</sup>                 | 97.31(14)  |
| O27 <sup>i</sup> —Cu1—O27                 | 179.999(1) | O25—Mo8—O7 <sup>iv</sup>                 | 94.25(14)  |
| O7 <sup>iv</sup> —Mo7—Mo3 <sup>iv</sup>   | 86.68(7)   | O25—Mo8—O24                              | 165.00(13) |
| O26—Mo8—O24                               | 90.34(13)  | O25—Mo8—O26                              | 104.64(16) |
| O14—Mo3—Mo7 <sup>ii</sup>                 | 110.23(8)  | O26—Mo8—O17                              | 101.49(13) |
| O14—Mo3—O10                               | 70.34(10)  | O26—Mo8—O3 <sup>iv</sup>                 | 92.78(12)  |
| O14—Mo3—O8                                | 77.30(12)  | O26—Mo8—O7 <sup>iv</sup>                 | 156.81(13) |

### Compound 3

|                         |            |                                         |            |
|-------------------------|------------|-----------------------------------------|------------|
| Mo1—O1                  | 1.685(2)   | Mo3—O9                                  | 1.702(3)   |
| Mo1—O2                  | 1.701(3)   | Mo3—O10                                 | 1.787(2)   |
| Mo1—O3                  | 1.969(3)   | Mo4—O3                                  | 1.831(3)   |
| Mo1—O4                  | 2.363(2)   | Mo4—O11                                 | 1.838(2)   |
| Mo1—O5                  | 1.915(2)   | Mo4—O12                                 | 1.692(3)   |
| Mo1—O10                 | 2.290(3)   | Mo4—O13                                 | 1.698(3)   |
| Mo2—O4                  | 2.348(3)   | Cu3—N2                                  | 1.984(3)   |
| Mo2—O5                  | 1.894(2)   | Cu3—N2 <sup>ii</sup>                    | 1.984(3)   |
| Mo2—O6                  | 1.705(3)   | Cu3—N4 <sup>iii</sup>                   | 2.014(3)   |
| Mo2—O7                  | 1.692(3)   | Cu3—N4 <sup>iv</sup>                    | 2.014(3)   |
| Mo2—O8                  | 2.338(3)   | N4—Cu3 <sup>v</sup>                     | 2.014(3)   |
| Mo2—O11 <sup>i</sup>    | 1.977(2)   | Mo3—O8                                  | 1.753(3)   |
| Mo3—O4 <sup>i</sup>     | 1.831(2)   | O9—Mo3—O4 <sup>i</sup>                  | 106.33(12) |
| O1—Mo1—O2               | 105.79(14) | O9—Mo3—O8                               | 106.83(13) |
| O1—Mo1—O3               | 99.92(12)  | O9—Mo3—O10                              | 107.02(12) |
| O1—Mo1—O4               | 162.81(12) | O10—Mo3—O4 <sup>i</sup>                 | 115.24(11) |
| O1—Mo1—O5               | 100.52(12) | O3—Mo4—O11                              | 118.96(11) |
| O1—Mo1—O10              | 91.97(12)  | O12—Mo4—O3                              | 109.58(14) |
| O2—Mo1—O3               | 94.36(12)  | O12—Mo4—O11                             | 107.73(14) |
| O2—Mo1—O4               | 91.00(11)  | O12—Mo4—O13                             | 107.04(18) |
| O2—Mo1—O5               | 100.38(13) | O13—Mo4—O3                              | 105.20(14) |
| O2—Mo1—O10              | 161.37(11) | O13—Mo4—O11                             | 107.74(13) |
| O3—Mo1—O4               | 82.08(9)   | N2—Cu3—N2 <sup>ii</sup>                 | 180.000    |
| O3—Mo1—O10              | 76.7(1)    | N2—Cu3—N4 <sup>iii</sup>                | 90.89(12)  |
| O5—Mo1—O3               | 150.40(9)  | N2 <sup>ii</sup> —Cu3—N4 <sup>iii</sup> | 89.11(12)  |
| O5—Mo1—O4               | 72.21(9)   | N2—Cu3—N4 <sup>iv</sup>                 | 89.11(12)  |
| O5—Mo1—O10              | 81.43(10)  | N2 <sup>ii</sup> —Cu3—N4 <sup>iv</sup>  | 90.89(12)  |
| O10—Mo1—O4              | 71.76(9)   | N4 <sup>iii</sup> —Cu3—N4 <sup>iv</sup> | 180.000(1) |
| O5—Mo2—O4               | 72.91(9)   | C9—N2—Cu3                               | 126.8(3)   |
| O5—Mo2—O8               | 82.76(10)  | C10—N2—Cu3                              | 127.1(3)   |
| O5—Mo2—O11 <sup>i</sup> | 148.94(11) | C13—N4—Cu3 <sup>v</sup>                 | 130.0(3)   |
| O6—Mo2—O4               | 98.40(11)  | C14—N4—Cu3 <sup>v</sup>                 | 122.7(3)   |
| O6—Mo2—O5               | 100.64(11) | O7—Mo2—O11 <sup>i</sup>                 | 101.04(11) |
| O6—Mo2—O8               | 167.93(11) | O8—Mo2—O4                               | 71.36(9)   |
| O6—Mo2—O11 <sup>i</sup> | 93.17(11)  | O11 <sup>i</sup> —Mo2—O4                | 77.65(9)   |
| O7—Mo2—O4               | 157.82(11) | O11 <sup>i</sup> —Mo2—O8                | 78.62(10)  |
| O7—Mo2—O5               | 102.44(11) | O8—Mo3—O4 <sup>i</sup>                  | 110.32(11) |
| O7—Mo2—O6               | 103.77(13) | O8—Mo3—O10                              | 110.61(11) |

### Compound 4

|        |          |                     |          |
|--------|----------|---------------------|----------|
| Mo1—O1 | 1.694(4) | Mo3—O4              | 1.846(3) |
| Mo1—O2 | 1.707(3) | Mo3—O8 <sup>i</sup> | 1.964(3) |
| Mo1—O3 | 1.903(3) | Mo3—O9              | 1.685(3) |
| Mo1—O4 | 2.355(3) | Mo3—O10             | 1.797(3) |

|                            |            |                                       |            |
|----------------------------|------------|---------------------------------------|------------|
| Mo1—O11 <sup>i</sup>       | 2.125(3)   | Mo3—O11 <sup>i</sup>                  | 2.124(3)   |
| Mo1—N1                     | 2.207(4)   | Mo4—O7                                | 1.908(3)   |
| Mo2—O3                     | 1.936(3)   | Mo4—O8                                | 2.146(3)   |
| Mo2—O4                     | 2.316(3)   | Mo4—O10                               | 2.382(3)   |
| Mo2—O5                     | 1.702(3)   | Mo4—O11                               | 1.940(3)   |
| Mo2—O6                     | 1.699(3)   | Mo4—O12                               | 1.692(3)   |
| Mo2—O7                     | 1.977(3)   | Mo4—O13                               | 1.760(3)   |
| Mo2—O8                     | 2.251(3)   | Cu1—O10                               | 1.972(3)   |
| Cu1—N3                     | 1.973(4)   | Cu1—O13                               | 2.003(3)   |
| Cu1—N6 <sup>ii</sup>       | 1.963(4)   | Cu1—O14                               | 2.385(11)  |
| Cu1—O14A                   | 2.362(13)  | O4—Mo3—O8 <sup>i</sup>                | 139.52(13) |
| O1—Mo1—O2                  | 105.27(18) | O4—Mo3—O11 <sup>i</sup>               | 77.64(13)  |
| O1—Mo1—O3                  | 102.91(15) | O8 <sup>i</sup> —Mo3—O11 <sup>i</sup> | 72.53(12)  |
| O1—Mo1—O4                  | 160.65(14) | O9—Mo3—O4                             | 105.24(14) |
| O1—Mo1—O11 <sup>i</sup>    | 93.60(15)  | O9—Mo3—O8 <sup>i</sup>                | 105.05(14) |
| O1—Mo1—N1                  | 95.59(16)  | O9—Mo3—O10                            | 102.51(15) |
| O2—Mo1—O3                  | 99.97(15)  | O9—Mo3—O11 <sup>i</sup>               | 97.14(14)  |
| O2—Mo1—O4                  | 94.07(16)  | O10—Mo3—O4                            | 102.39(14) |
| O2—Mo1—O11 <sup>i</sup>    | 156.23(16) | O10—Mo3—O8 <sup>i</sup>               | 96.56(13)  |
| O2—Mo1—N1                  | 84.57(15)  | O10—Mo3—O11 <sup>i</sup>              | 159.52(12) |
| O3—Mo1—O4                  | 73.71(12)  | O7—Mo4—O8                             | 74.87(12)  |
| O3—Mo1—O11 <sup>i</sup>    | 89.50(12)  | O7—Mo4—O10                            | 81.42(12)  |
| O3—Mo1—N1                  | 158.92(15) | O7—Mo4—O11                            | 146.92(14) |
| O11 <sup>i</sup> —Mo1—O4   | 67.56(11)  | O8—Mo4—O10                            | 72.63(11)  |
| O11 <sup>i</sup> —Mo1—N1   | 79.24(13)  | O11—Mo4—O8                            | 72.49(12)  |
| N1—Mo1—O4                  | 85.48(13)  | O11—Mo4—O10                           | 83.91(11)  |
| O3—Mo2—O4                  | 74.08(12)  | O12—Mo4—O7                            | 98.17(15)  |
| O3—Mo2—O7                  | 149.59(13) | O12—Mo4—O8                            | 109.18(14) |
| O3—Mo2—O8                  | 84.18(12)  | O12—Mo4—O10                           | 178.01(14) |
| O5—Mo2—O3                  | 102.76(16) | O12—Mo4—O11                           | 97.41(14)  |
| O5—Mo2—O4                  | 90.47(15)  | O12—Mo4—O13                           | 103.68(15) |
| O5—Mo2—O7                  | 95.73(16)  | O13—Mo4—O7                            | 104.21(15) |
| O5—Mo2—O8                  | 160.54(16) | O13—Mo4—O8                            | 146.95(13) |
| O6—Mo2—O3                  | 97.51(16)  | O13—Mo4—O10                           | 74.58(13)  |
| O6—Mo2—O4                  | 164.50(14) | O13—Mo4—O11                           | 100.17(14) |
| O6—Mo2—O5                  | 104.24(18) | O10—Cu1—O13                           | 80.09(13)  |
| O6—Mo2—O7                  | 101.10(15) | O10—Cu1—O14                           | 105.7(5)   |
| O6—Mo2—O8                  | 92.66(14)  | O10—Cu1—N3                            | 91.38(15)  |
| O7—Mo2—O4                  | 81.92(13)  | O10—Cu1—O14A                          | 91.0(5)    |
| O7—Mo2—O8                  | 71.20(12)  | O13—Cu1—O14                           | 87.8(4)    |
| O8—Mo2—O4                  | 73.78(10)  | O13—Cu1—O14A                          | 81.3(4)    |
| N6 <sup>ii</sup> —Cu1—O14  | 89.0(5)    | N3—Cu1—O13                            | 170.69(16) |
| N6 <sup>ii</sup> —Cu1—N3   | 96.31(17)  | N3—Cu1—O14                            | 90.9(4)    |
| N6 <sup>ii</sup> —Cu1—O14A | 102.9(6)   | N3—Cu1—O14A                           | 95.2(5)    |



|                   |            |                                         |            |
|-------------------|------------|-----------------------------------------|------------|
| O14A—Cu1—O14      | 15.1(4)    | N6 <sup>ii</sup> —Cu1—O10               | 163.33(15) |
| Cu1—O10—Mo4       | 91.98(12)  | N6 <sup>ii</sup> —Cu1—O13               | 92.90(15)  |
| <b>Compound 5</b> |            |                                         |            |
| Mo1—O2            | 1.732(3)   | Co1—O19 <sup>ii</sup>                   | 2.078(2)   |
| Mo1—O3            | 1.692(3)   | Mo5—O17                                 | 2.223(3)   |
| Mo1—O4            | 1.894(3)   | Mo5—O18                                 | 2.408(3)   |
| Mo1—O5            | 1.991(2)   | Mo5—O19                                 | 1.738(3)   |
| Mo1—O6            | 2.177(3)   | Mo5—O20                                 | 1.693(3)   |
| Mo1—O7            | 2.229(3)   | Mo5—O21                                 | 1.832(2)   |
| Mo2—Mo3           | 3.2113(4)  | Mo6—O11                                 | 1.989(2)   |
| Mo2—O6            | 2.401(3)   | Mo6—O14                                 | 2.147(3)   |
| Mo2—O7            | 1.762(3)   | Mo6—O18                                 | 1.750(3)   |
| Mo2—O8            | 1.831(3)   | Mo6—O22                                 | 1.687(3)   |
| Mo2—O9            | 1.679(3)   | Mo6—O23                                 | 1.842(2)   |
| Mo2—O10           | 2.074(3)   | Mo7—O8 <sup>i</sup>                     | 1.935(3)   |
| Mo2—O11           | 2.082(2)   | Mo7—O14                                 | 1.969(2)   |
| Mo3—O10           | 1.865(2)   | Mo7—O23                                 | 2.291(3)   |
| Mo3—O11           | 2.215(3)   | Mo7—O24                                 | 1.688(3)   |
| Mo3—O12           | 1.699(3)   | Mo7—O25                                 | 1.688(3)   |
| Mo3—O13           | 1.717(3)   | Mo7—O26                                 | 2.281(3)   |
| Mo3—O14           | 1.999(3)   | Mo8—O4 <sup>i</sup>                     | 1.872(3)   |
| Mo3—O15           | 2.384(3)   | Mo8—O17                                 | 2.070(2)   |
| Mo4—O5            | 2.110(3)   | Mo8—O21                                 | 2.074(3)   |
| Mo4—O6            | 1.881(2)   | Mo8—O23                                 | 2.381(3)   |
| Mo4—O11           | 2.463(3)   | Mo8—O26                                 | 1.751(3)   |
| Mo4—O15           | 1.741(3)   | Mo8—O27                                 | 1.677(3)   |
| Mo4—O16           | 1.680(3)   | Co1—O1 <sup>ii</sup>                    | 2.026(3)   |
| Mo4—O17           | 1.998(2)   | Co1—O1                                  | 2.026(3)   |
| Mo5—Mo8           | 3.2086(4)  | Co1—O2 <sup>ii</sup>                    | 2.162(3)   |
| Mo5—O5            | 1.969(2)   | Co1—O2                                  | 2.162(3)   |
| Co1—O19           | 2.078(2)   | O27—Mo8—O17                             | 97.91(12)  |
| O2—Mo1—O4         | 103.42(12) | O27—Mo8—O21                             | 97.90(13)  |
| O2—Mo1—O5         | 89.97(11)  | O27—Mo8—O23                             | 174.15(11) |
| O2—Mo1—O6         | 154.74(11) | O27—Mo8—O26                             | 103.27(14) |
| O2—Mo1—O7         | 89.08(11)  | O1—Co1—O1 <sup>ii</sup>                 | 180.000    |
| O3—Mo1—O2         | 104.56(13) | O1 <sup>ii</sup> —Co1—O2 <sup>ii</sup>  | 92.04(11)  |
| O3—Mo1—O4         | 96.46(13)  | O1—Co1—O2 <sup>ii</sup>                 | 87.96(11)  |
| O3—Mo1—O5         | 96.91(12)  | O1—Co1—O2                               | 92.04(11)  |
| O3—Mo1—O6         | 94.61(12)  | O1 <sup>ii</sup> —Co1—O2                | 87.96(11)  |
| O3—Mo1—O7         | 166.36(13) | O1—Co1—O19                              | 89.11(11)  |
| O4—Mo1—O5         | 158.03(11) | O1 <sup>ii</sup> —Co1—O19               | 90.89(11)  |
| O4—Mo1—O6         | 90.36(10)  | O1 <sup>ii</sup> —Co1—O19 <sup>ii</sup> | 89.11(11)  |
| O4—Mo1—O7         | 79.97(11)  | O1—Co1—O19 <sup>ii</sup>                | 90.89(11)  |
| O5—Mo1—O6         | 71.25(10)  | O2 <sup>ii</sup> —Co1—O2                | 180.000    |

|             |            |                                         |            |
|-------------|------------|-----------------------------------------|------------|
| O5—Mo1—O7   | 82.95(10)  | O19—Co1—O2                              | 92.14(11)  |
| O6—Mo1—O7   | 72.36(10)  | O19 <sup>ii</sup> —Co1—O2               | 87.86(11)  |
| O6—Mo2—Mo3  | 87.04(6)   | O19 <sup>ii</sup> —Co1—O2 <sup>ii</sup> | 92.14(11)  |
| O7—Mo2—Mo3  | 132.35(8)  | O19—Co1—O2 <sup>ii</sup>                | 87.86(11)  |
| O7—Mo2—O6   | 75.61(11)  | O19—Co1—O19 <sup>ii</sup>               | 179.998(1) |
| O7—Mo2—O8   | 102.39(12) | O14—Mo7—O23                             | 70.27(10)  |
| O7—Mo2—O10  | 154.24(11) | O14—Mo7—O26                             | 82.48(10)  |
| O7—Mo2—O11  | 89.15(11)  | O24—Mo7—O8 <sup>i</sup>                 | 96.60(14)  |
| O8—Mo2—Mo3  | 120.15(9)  | O24—Mo7—O14                             | 97.52(13)  |
| O8—Mo2—O6   | 85.03(11)  | O24—Mo7—O23                             | 96.24(13)  |
| O8—Mo2—O10  | 86.91(11)  | O24—Mo7—O26                             | 165.33(14) |
| O8—Mo2—O11  | 153.12(13) | O25—Mo7—O8 <sup>i</sup>                 | 100.56(14) |
| O9—Mo2—Mo3  | 86.97(9)   | O25—Mo7—O14                             | 98.32(13)  |
| O9—Mo2—O6   | 171.01(12) | O25—Mo7—O23                             | 157.51(13) |
| O9—Mo2—O7   | 103.73(14) | O25—Mo7—O24                             | 104.61(16) |
| O9—Mo2—O8   | 103.79(14) | O25—Mo7—O26                             | 89.85(13)  |
| O9—Mo2—O10  | 97.10(12)  | O26—Mo7—O23                             | 69.86(9)   |
| O9—Mo2—O11  | 96.74(12)  | O4 <sup>i</sup> —Mo8—Mo5                | 118.33(8)  |
| O10—Mo2—Mo3 | 33.30(7)   | O4 <sup>i</sup> —Mo8—O17                | 152.85(12) |
| O10—Mo2—O6  | 81.44(9)   | O4 <sup>i</sup> —Mo8—O21                | 86.00(11)  |
| O10—Mo2—O11 | 73.34(10)  | O4 <sup>i</sup> —Mo8—O23                | 83.5(1)    |
| O11—Mo2—Mo3 | 43.24(7)   | O17—Mo8—Mo5                             | 43.48(7)   |
| O11—Mo2—O6  | 74.32(9)   | O17—Mo8—O21                             | 73.16(10)  |
| O10—Mo3—Mo2 | 37.62(8)   | O17—Mo8—O23                             | 76.24(9)   |
| O10—Mo3—O11 | 74.39(10)  | O21—Mo8—Mo5                             | 32.37(7)   |
| O10—Mo3—O14 | 143.11(11) | O21—Mo8—O23                             | 80.72(10)  |
| O10—Mo3—O15 | 80.46(10)  | O23—Mo8—Mo5                             | 86.68(6)   |
| O11—Mo3—Mo2 | 40.08(6)   | O26—Mo8—Mo5                             | 134.81(9)  |
| O11—Mo3—O15 | 70.14(9)   | O26—Mo8—O4 <sup>i</sup>                 | 101.47(12) |
| O12—Mo3—Mo2 | 90.53(9)   | O26—Mo8—O17                             | 91.46(11)  |
| O12—Mo3—O10 | 100.66(12) | O26—Mo8—O21                             | 155.39(12) |
| O12—Mo3—O11 | 99.43(12)  | O26—Mo8—O23                             | 76.94(11)  |
| O12—Mo3—O13 | 103.89(13) | O27—Mo8—Mo5                             | 89.16(9)   |
| O12—Mo3—O14 | 95.71(12)  | O27—Mo8—O4 <sup>i</sup>                 | 102.11(13) |
| O12—Mo3—O15 | 168.93(12) | O5—Mo5—Mo8                              | 109.66(7)  |
| O13—Mo3—Mo2 | 145.23(9)  | O5—Mo5—O17                              | 69.96(9)   |
| O13—Mo3—O10 | 107.86(12) | O5—Mo5—O18                              | 77.46(10)  |
| O13—Mo3—O11 | 155.58(11) | O17—Mo5—Mo8                             | 39.85(6)   |
| O13—Mo3—O14 | 99.82(12)  | O17—Mo5—O18                             | 71.97(9)   |
| O13—Mo3—O15 | 86.06(11)  | O18—Mo5—Mo8                             | 83.77(6)   |
| O14—Mo3—Mo2 | 110.17(7)  | O19—Mo5—Mo8                             | 144.42(9)  |
| O14—Mo3—O11 | 70.43(9)   | O19—Mo5—O5                              | 98.45(11)  |
| O14—Mo3—O15 | 77.57(10)  | O19—Mo5—O17                             | 152.66(11) |
| O15—Mo3—Mo2 | 83.70(6)   | O19—Mo5—O18                             | 81.48(11)  |

|                          |            |             |            |
|--------------------------|------------|-------------|------------|
| O5—Mo4—O11               | 80.14(9)   | O19—Mo5—O21 | 107.96(12) |
| O6—Mo4—O5                | 74.86(10)  | O20—Mo5—Mo8 | 93.82(9)   |
| O6—Mo4—O11               | 76.23(10)  | O20—Mo5—O5  | 96.43(12)  |
| O6—Mo4—O17               | 140.36(12) | O20—Mo5—O17 | 101.43(12) |
| O15—Mo4—O5               | 155.69(11) | O20—Mo5—O18 | 172.14(12) |
| O15—Mo4—O6               | 102.67(12) | O20—Mo5—O19 | 104.50(13) |
| O15—Mo4—O11              | 75.85(11)  | O20—Mo5—O21 | 102.33(12) |
| O15—Mo4—O17              | 98.93(11)  | O21—Mo5—Mo8 | 37.30(8)   |
| O16—Mo4—O5               | 99.67(12)  | O21—Mo5—O5  | 142.24(11) |
| O16—Mo4—O6               | 103.96(12) | O21—Mo5—O17 | 74.33(10)  |
| O16—Mo4—O11              | 179.70(13) | O21—Mo5—O18 | 80.27(10)  |
| O16—Mo4—O15              | 104.32(13) | O11—Mo6—O14 | 72.06(10)  |
| O16—Mo4—O17              | 102.31(12) | O18—Mo6—O11 | 95.91(11)  |
| O17—Mo4—O5               | 71.87(10)  | O18—Mo6—O14 | 153.99(11) |
| O17—Mo4—O11              | 77.41(9)   | O18—Mo6—O23 | 103.13(12) |
| O23—Mo6—O11              | 140.49(12) | O22—Mo6—O11 | 101.95(12) |
| O23—Mo6—O14              | 75.92(11)  | O22—Mo6—O14 | 100.12(12) |
| O8 <sup>i</sup> —Mo7—O14 | 152.69(11) | O22—Mo6—O18 | 104.99(13) |
| O8 <sup>i</sup> —Mo7—O23 | 85.06(10)  | O22—Mo6—O23 | 105.97(12) |

### Compound 6

|                                       |            |                                       |            |
|---------------------------------------|------------|---------------------------------------|------------|
| Mo1—O1                                | 1.708(6)   | Zn1—O1                                | 1.917(6)   |
| Mo1—O2 <sup>i</sup>                   | 1.686(6)   | Zn1—N1 <sup>ii</sup>                  | 1.990(4)   |
| Mo1—O2 <sup>ii</sup>                  | 1.686(6)   | Zn1—N1 <sup>i</sup>                   | 1.990(4)   |
| Mo1—O2                                | 1.686(6)   | Zn1—N1                                | 1.990(4)   |
| O2—Mo1—O1                             | 111.1(2)   | N1 <sup>ii</sup> —Zn1—N1 <sup>i</sup> | 111.28(10) |
| O2 <sup>i</sup> —Mo1—O1               | 111.1(2)   | N1 <sup>ii</sup> —Zn1—N1              | 111.28(10) |
| O2 <sup>ii</sup> —Mo1—O1              | 111.1(2)   | N1 <sup>i</sup> —Zn1—N1               | 111.28(10) |
| O2 <sup>i</sup> —Mo1—O2               | 107.8(3)   | Mo1—O1—Zn1                            | 180.000    |
| O2 <sup>ii</sup> —Mo1—O2              | 107.8(3)   | H3A—O3—H3B                            | 107.300    |
| O2 <sup>ii</sup> —Mo1—O2 <sup>i</sup> | 107.8(3)   | C1—N1—Zn1                             | 124.7(3)   |
| O1—Zn1—N1 <sup>ii</sup>               | 107.59(11) | C3—N1—Zn1                             | 129.4(3)   |
| O1—Zn1—N1 <sup>i</sup>                | 107.59(11) | O1—Zn1—N1                             | 107.59(11) |

**Table S2.** Selected hydrogen bonds for compound 1-6

| Atoms D,H,A              | Dist. D,H [Å] | Dist. H,A [Å] | Dist. D,A [Å] | Angle D,H,A [°] |
|--------------------------|---------------|---------------|---------------|-----------------|
| <b>Compound 1</b>        |               |               |               |                 |
| N2—H2—O41                | 0.8600        | 1.9000        | 2.752(9)      | 172.200         |
| N12—H12A—O40             | 0.8600        | 2.0300        | 2.830(8)      | 155.100         |
| O41—H41B—O17             | 0.8500        | 2.2700        | 2.814(6)      | 122.000         |
| <b>Compound 2</b>        |               |               |               |                 |
| O27—H27A—O9              | 0.8700        | 1.8800        | 2.720(4)      | 160.200         |
| O27—H27B—O28             | 0.8700        | 1.7700        | 2.632(7)      | 168.200         |
| N4—H4—O26                | 0.8600        | 2.0100        | 2.850(5)      | 165.900         |
| N6—H6A—O13               | 0.8600        | 1.9600        | 2.809(6)      | 168.200         |
| O28—H28B—O25             | 0.8500        | 2.4300        | 2.817(7)      | 108.500         |
| <b>Compound 3</b>        |               |               |               |                 |
| O14—H14A—O15             | 0.8500        | 2.0700        | 2.876(6)      | 157.800         |
| O14—H14B—O10             | 0.8500        | 2.1500        | 2.969(5)      | 160.200         |
| O15—H15A—O9 <sup>i</sup> | 0.8500        | 2.1000        | 2.949(4)      | 174.600         |
| N6—H6—O14 <sup>ii</sup>  | 0.8600        | 1.9400        | 2.774(6)      | 162.900         |
| <b>Compound 4</b>        |               |               |               |                 |
| C—H···Cg                 | 0.9311        | 3.6031        | 3.644(7)      | 85.169          |
| <b>Compound 5</b>        |               |               |               |                 |
| O1—H1A—O28               | 0.8500        | 1.8300        | 2.672(6)      | 166.800         |
| O1—H1A—O28A              | 0.8500        | 2.0900        | 2.74(2)       | 132.200         |
| O1—H1B—O7                | 0.8600        | 2.5000        | 3.152(4)      | 133.600         |
| N2—H2—O10 <sup>i</sup>   | 0.8600        | 2.2500        | 2.900(6)      | 132.900         |
| N4—H4—O13 <sup>ii</sup>  | 0.8600        | 1.9800        | 2.824(5)      | 167.400         |
| N6—H6—O2 <sup>iii</sup>  | 0.8600        | 2.1800        | 3.031(5)      | 170.700         |
| <b>Compound 6</b>        |               |               |               |                 |
| O3—H3A—O2 <sup>i</sup>   | 0.8500        | 1.8700        | 2.716(10)     | 179.400         |
| O3—H3B—O2 <sup>ii</sup>  | 0.8500        | 2.5200        | 3.268(11)     | 147.100         |

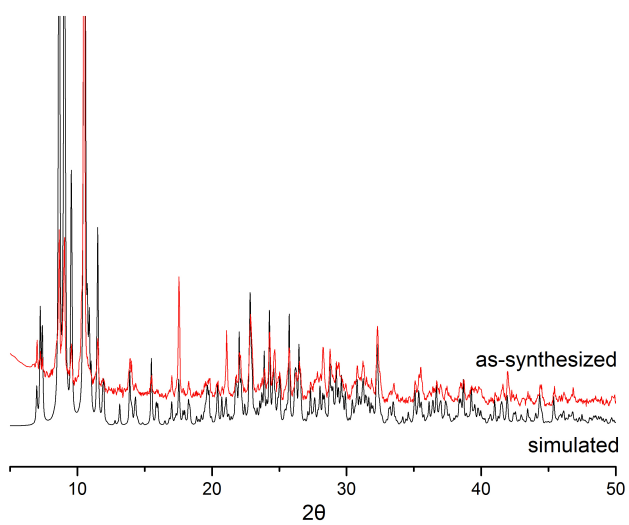

Compound 1

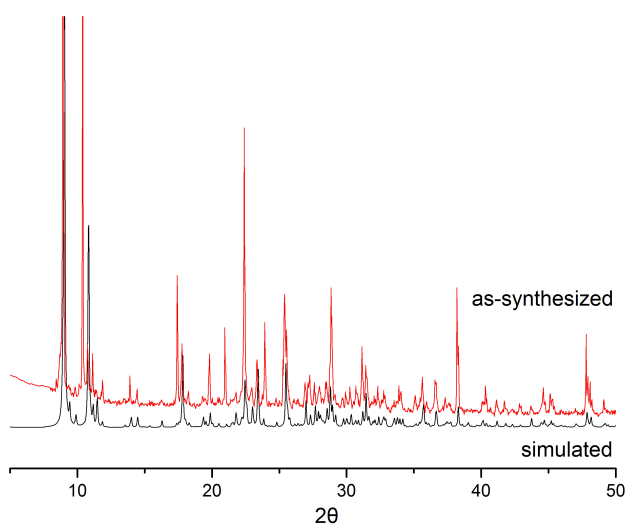

Compound 2

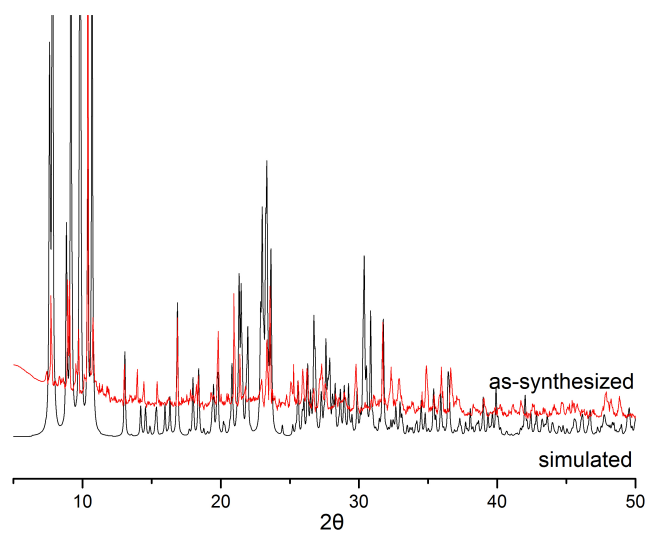

Compound 3

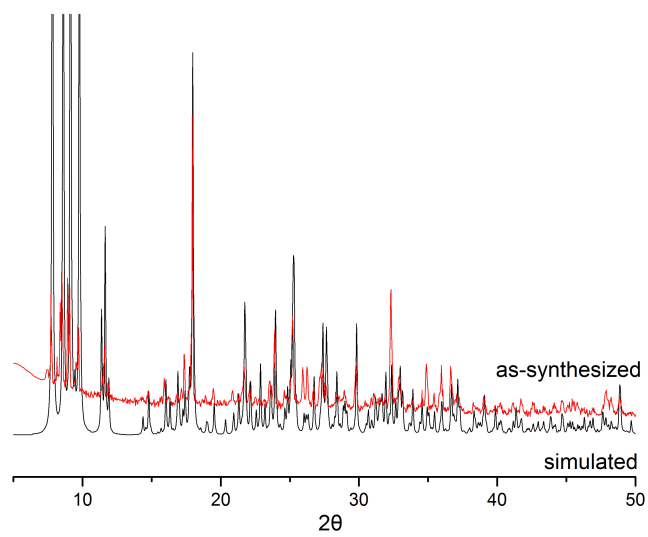

Compound 4

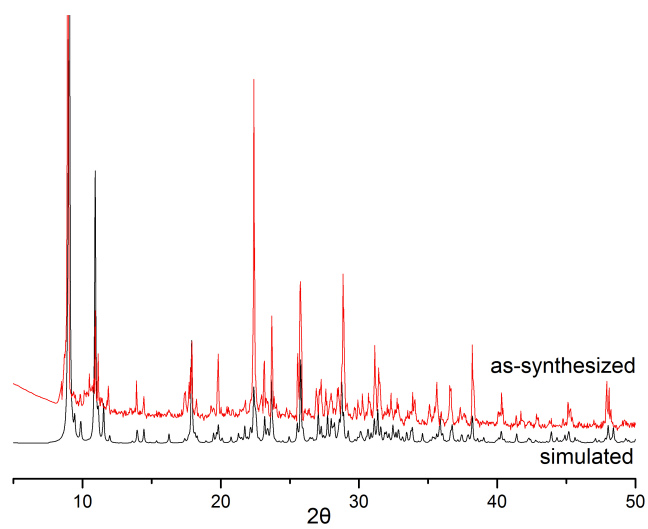

Compound 5

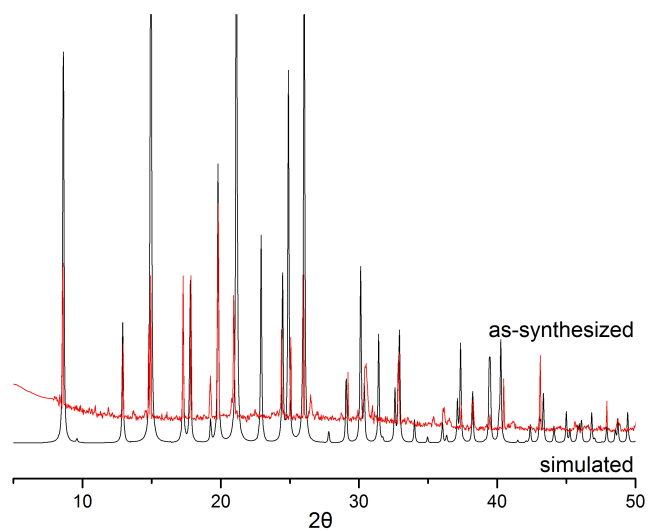

Compound 6

**Fig. S1.** PXRD patterns of compounds 1-6.

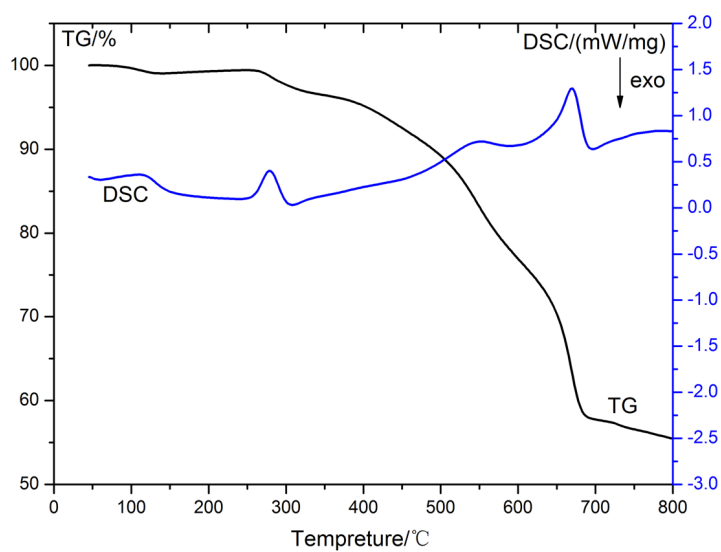

Compound 1

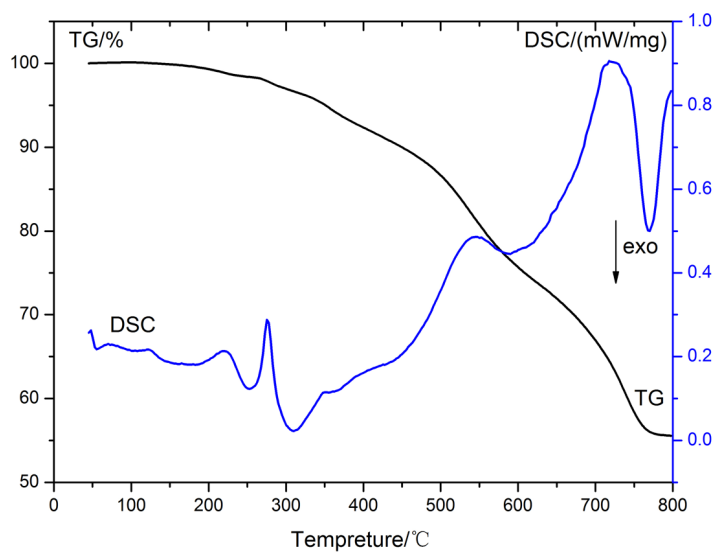

Compound 2



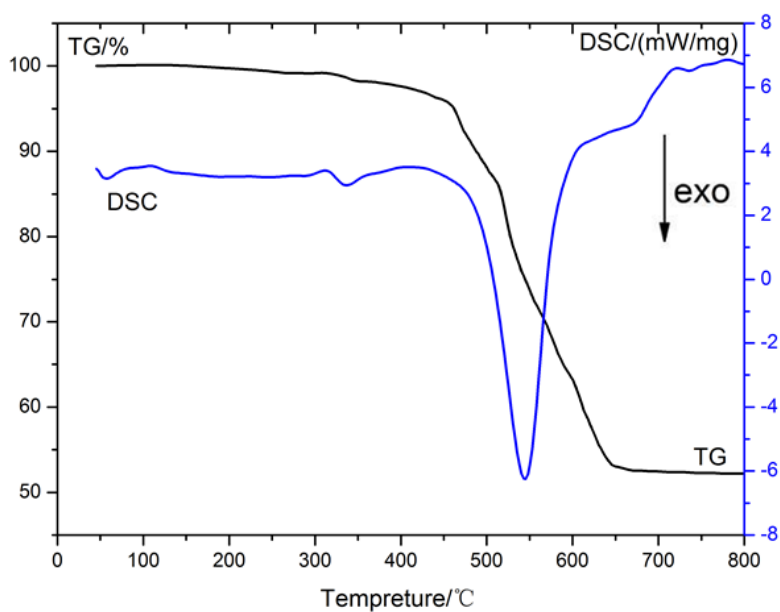

Compound 3

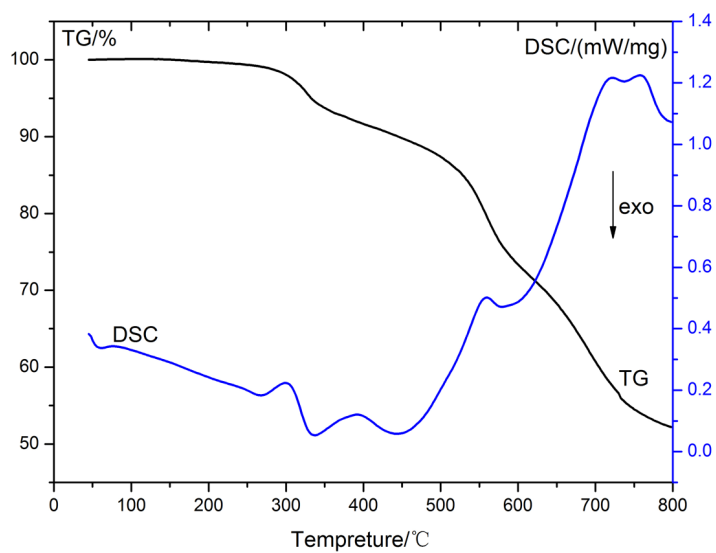

Compound 4

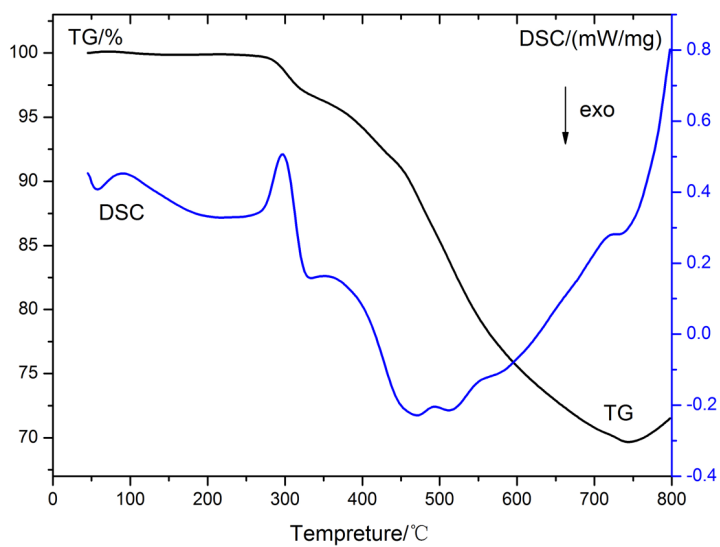

### Compound 5

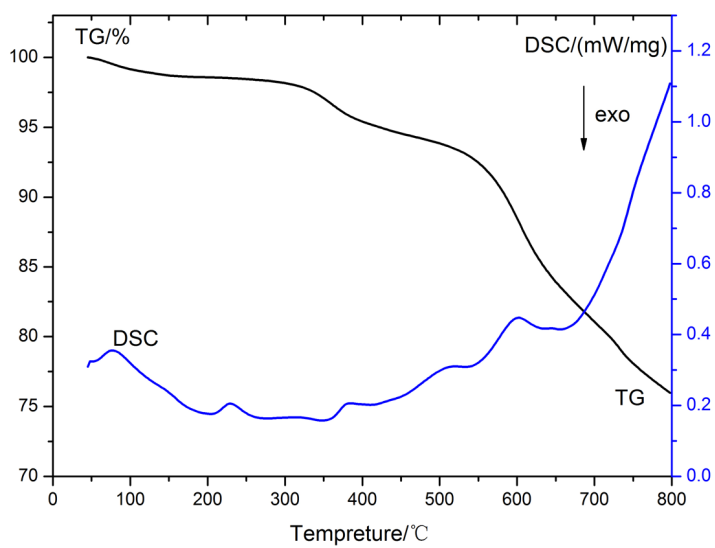

### Compound 6

**Fig. S2** The TG-DSC curves of compounds 1-6
